# Supplementary material
Source: publisher figshare collection journal article supplement (https://gsajournals.figshare.com/ndownloader/files/29052294)
Supplement: Supplementary file 1 [file 29052294]

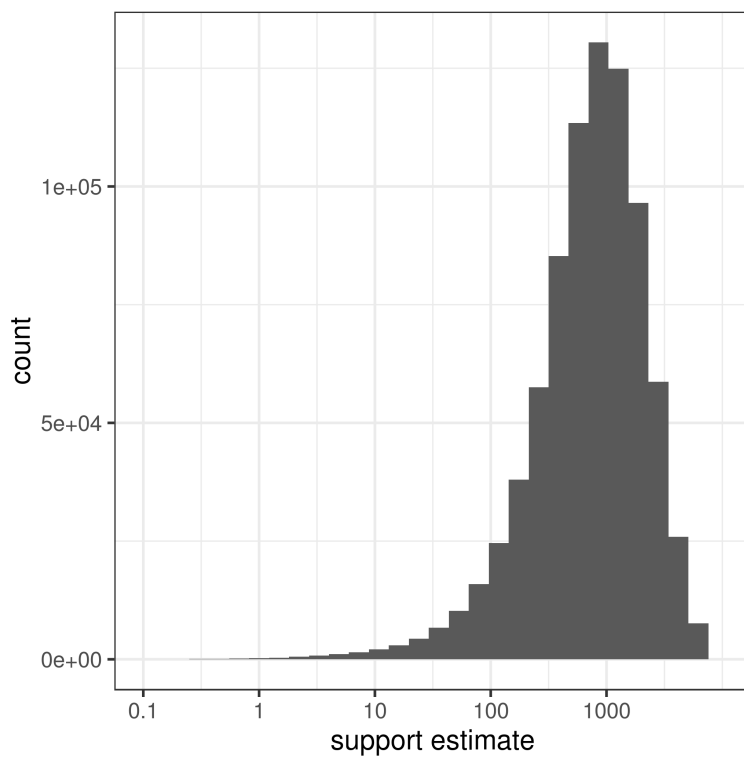

**Figure S6. Distribution of support estimates of ML diplotypes.** Plotted is  $\Delta\log L$  between the best and the second best supported diplotype across all loci and samples.
